# Supplementary material for: The Anti-Inflammatory and Anti-Pruritus Mechanisms of Huanglian Jiedu Decoction in the Treatment of Atopic Dermatitis
Source: Front Pharmacol. 2021 Dec 2;12:735295. doi: 10.3389/fphar.2021.735295 (PMC8675233; doi:10.3389/fphar.2021.735295)
Supplement: Supplementary file 3 [file Table1.XLSX]

## Sheet: Sheet1
R.T. (min)	m/z	Ion mode	Compounds
0.58	191.056	Negative	Quinic acid
7.11	263.129	Negative	(+).Abscisic acid
4.4	239.083	Negative	.beta..Carboline.1.propionic acid
10.32	293.176	Negative	[6].Gingerol
11.08	313.238	Negative	12,13.Dihydroxy.9Z.octadecenoic acid
15	271.228	Negative	2.Hydroxypalmitic acid
2.9	175.061	Negative	2.Isopropylmalic acid
2.58	137.025	Negative	3,4.Dihydroxybenzaldehyde
3.17	211.061	Negative	3',4'.Dihydroxyphenylacetone
5.14	223.061	Negative	3,5.Dimethoxy.4.hydroxycinnamic acid
1.19	189.04	Negative	3.Dehydroquinic acid
3.52	121.03	Negative	4.Hydroxybenzaldehyde
3.12	353.087	Negative	4-O-Caffeoylquinic acid
0.6	193.035	Negative	5.Keto.D.gluconic acid
11.26	313.238	Negative	9,10.Dihydroxy.12Z.octadecenoic acid
8.35	269.045	Negative	Baicalein
7.13	459.091	Negative	Baicalin methyl ester
3.28	179.035	Negative	Caffeic acid
2.9	353.087	Negative	Chlorogenic acid
9.81	253.051	Negative	Chrysin
5.38	547.145	Negative	Chrysin 6.C.glucoside.8.C.alpha.L.arabinopyranoside
4.87	183.103	Negative	cis.Pinonic acid
0.81	191.02	Negative	Citric acid
8.49	975.371	Negative	Crocin
7.46	429.082	Negative	Dihydronorwogonin 7.O.glucuronide
0.63	134.021	Negative	DL.Malic acid
9.11	229.145	Negative	Dodecanedioic acid
10.28	343.082	Negative	Eupatilin
9.45	515.191	Negative	Evodin
7.73	207.067	Negative	Ferulic acid methyl ester
3.99	207.03	Negative	Fraxetin
1.08	169.014	Negative	Gallic acid
2.28	404.131	Negative	Gardenoside
3.82	225.077	Negative	Genipin
3.28	595.188	Negative	Genipin gentiobioside
1.78	373.114	Negative	Geniposidic acid
2.67	153.019	Negative	Gentisic acid
0.9	282.084	Negative	Guanosine
2.45	270.113	Negative	Higenamine
8.02	299.056	Negative	Hispidulin
4.8	195.066	Negative	Hydroferulic acid
8.6	359.076	Negative	Irigenin
2.43	198.033	Negative	IS
5.89	623.197	Negative	Isoverbascoside
9.2	299.056	Negative	Luteolin 7.methyl ether
0.58	549.166	Negative	Manninotriose
7.44	177.056	Negative	Methyl 4.hydroxy cinnamate
5.31	245.093	Negative	N.Acetyl.DL.tryptophan
1.73	218.104	Negative	Pantothenic acid
3.77	341.162	Negative	Phellodendrine
1.85	109.03	Negative	Pyrocatechol
5.18	609.146	Negative	Rutin
6.07	137.024	Negative	Salicylic acid
1.64	198.053	Negative	Salvianic acid A
4.51	563.14	Negative	Schaftoside
7.6	475.087	Negative	Scutellarin methyl ester
7.24	201.113	Negative	Sebacic acid
1.71	391.124	Negative	Shanzhiside
4.26	173.045	Negative	Shikimic acid
7.26	431.097	Negative	Sophoricoside
0.58	711.22	Negative	Stachyose
0.92	117.019	Negative	Succinic acid
2.49	165.019	Negative	Terephthalic acid
4.33	163.04	Negative	trans.2.Hydroxycinnamic acid
8.71	227.129	Negative	trans.Traumatic acid
9.72	283.061	Negative	Wogonin
7.8	459.092	Negative	Wogonoside
0.51	1006.72	Negative
0.51	114.989	Negative
0.51	158.979	Negative
0.51	175.965	Negative
0.51	244.964	Negative
0.51	272.959	Negative
0.51	288.936	Negative
0.51	291.946	Negative
0.51	292.931	Negative
0.51	402.916	Negative
0.51	362.941	Negative
0.51	418.894	Negative
0.51	386.939	Negative
0.51	408.933	Negative
0.51	424.91	Negative
0.51	486.881	Negative
0.51	516.896	Negative
0.51	476.92	Negative
0.51	538.891	Negative
0.51	500.918	Negative
0.51	502.859	Negative
0.51	508.875	Negative
0.51	512.891	Negative
0.51	520.856	Negative
0.51	532.875	Negative
0.51	600.862	Negative
0.51	560.885	Negative
0.51	570.846	Negative
0.51	576.861	Negative
0.51	606.879	Negative
0.51	613.832	Negative
0.51	621.819	Negative
0.51	622.855	Negative
0.51	632.817	Negative
0.51	616.839	Negative
0.51	638.833	Negative
0.51	686.8	Negative
0.51	736.835	Negative
0.51	720.79	Negative
0.51	727.812	Negative
0.51	735.803	Negative
0.51	743.791	Negative
0.51	746.797	Negative
0.51	748.803	Negative
0.51	762.778	Negative
0.51	800.783	Negative
0.51	834.776	Negative
0.51	857.771	Negative
0.51	865.757	Negative
0.51	876.758	Negative
0.51	922.749	Negative
0.54	164.935	Negative
0.54	226.966	Negative
0.54	227.882	Negative
0.54	242.943	Negative
0.54	278.913	Negative
0.54	330.879	Negative
0.54	287.851	Negative
0.54	292.861	Negative
0.54	294.892	Negative
0.54	294.953	Negative
0.54	300.85	Negative
0.54	304.914	Negative
0.54	308.907	Negative
0.54	398.85	Negative
0.54	378.916	Negative
0.54	392.894	Negative
0.54	404.808	Negative
0.54	408.871	Negative
0.54	414.828	Negative
0.54	420.788	Negative
0.54	434.871	Negative
0.54	446.904	Negative
0.54	506.875	Negative
0.54	512.832	Negative
0.54	522.852	Negative
0.54	528.81	Negative
0.54	534.766	Negative
0.54	538.829	Negative
0.54	544.787	Negative
0.54	548.852	Negative
0.54	550.743	Negative
0.54	564.83	Negative
0.54	642.788	Negative
0.54	648.747	Negative
0.54	662.833	Negative
0.54	668.786	Negative
0.54	678.811	Negative
0.54	694.789	Negative
0.54	792.791	Negative
0.54	808.769	Negative
0.54	824.745	Negative
0.54	938.727	Negative
0.56	180.973	Negative
0.56	262.91	Negative
0.56	235.871	Negative
0.56	248.899	Negative
0.56	295.841	Negative
0.56	310.871	Negative
0.56	348.895	Negative
0.56	368.834	Negative
0.56	382.846	Negative
0.56	430.806	Negative
0.56	400.908	Negative
0.56	424.849	Negative
0.56	426.847	Negative
0.56	440.828	Negative
0.56	472.763	Negative
0.56	500.842	Negative
0.56	554.808	Negative
0.56	557.786	Negative
0.56	560.764	Negative
0.56	568.831	Negative
0.56	570.786	Negative
0.56	576.743	Negative
0.56	636.823	Negative
0.56	674.747	Negative
0.56	684.766	Negative
0.56	690.724	Negative
0.56	700.746	Negative
0.56	752.736	Negative
0.56	801.138	Negative
0.56	814.725	Negative
0.58	132.031	Negative
0.58	181.072	Negative
0.58	208.917	Negative
0.58	214.049	Negative
0.58	232.885	Negative
0.58	242.08	Negative
0.58	250.994	Negative
0.58	259.04	Negative
0.58	262.931	Negative
0.58	267.072	Negative
0.58	302.101	Negative
0.58	333.059	Negative
0.58	335.156	Negative
0.58	343.121	Negative
0.58	354.797	Negative
0.58	367.104	Negative
0.58	421.074	Negative
0.58	429.124	Negative
0.58	445.023	Negative
0.58	539.137	Negative
0.58	617.155	Negative
0.58	633.127	Negative
0.58	701.192	Negative
0.58	779.209	Negative
0.58	785.158	Negative
0.58	795.181	Negative
0.58	797.267	Negative
0.58	873.274	Negative
0.58	847.196	Negative
0.58	857.277	Negative
0.6	113.025	Negative
0.6	134.917	Negative
0.6	165.04	Negative
0.6	173.105	Negative
0.6	179.056	Negative
0.6	195.051	Negative
0.6	200.989	Negative
0.6	209.067	Negative
0.6	215.033	Negative
0.6	216.967	Negative
0.6	217.048	Negative
0.6	221.066	Negative
0.6	278.013	Negative
0.6	293.099	Negative
0.6	307.925	Negative
0.6	312.933	Negative
0.6	312.985	Negative
0.6	313.113	Negative
0.6	341.108	Negative
0.6	371.118	Negative
0.6	373.134	Negative
0.6	377.085	Negative
0.6	379.083	Negative
0.6	387.113	Negative
0.6	390.127	Negative
0.6	404.104	Negative
0.6	409.059	Negative
0.6	417.124	Negative
0.6	461.149	Negative
0.6	467.017	Negative
0.6	471.075	Negative
0.6	477.144	Negative
0.6	473.161	Negative
0.6	507.156	Negative
0.6	513.084	Negative
0.6	513.12	Negative
0.6	515.22	Negative
0.6	521.171	Negative
0.6	532.185	Negative
0.6	533.171	Negative
0.6	566.155	Negative
0.6	597.105	Negative
0.6	603.089	Negative
0.6	619.067	Negative
0.6	625.083	Negative
0.6	635.214	Negative
0.6	644.219	Negative
0.6	683.225	Negative
0.6	695.225	Negative
0.6	728.211	Negative
0.6	769.181	Negative
0.6	835.093	Negative
0.6	841.108	Negative
0.63	131.035	Negative
0.63	163.025	Negative
0.63	179.02	Negative
0.63	191.946	Negative
0.63	208.937	Negative
0.63	245.043	Negative
0.63	292.072	Negative
0.63	295.067	Negative
0.63	297.083	Negative
0.63	309.044	Negative
0.63	322.914	Negative
0.63	353.109	Negative
0.63	374.094	Negative
0.63	385.098	Negative
0.63	387.078	Negative
0.63	395.061	Negative
0.63	447.135	Negative
0.63	425.069	Negative
0.63	445.073	Negative
0.63	453.091	Negative
0.63	475.129	Negative
0.63	488.019	Negative
0.63	515.16	Negative
0.63	522.993	Negative
0.63	535.152	Negative
0.63	537.166	Negative
0.63	547.151	Negative
0.63	552.185	Negative
0.63	609.188	Negative
0.63	634.188	Negative
0.63	637.183	Negative
0.63	799.237	Negative
0.63	803.176	Negative
0.63	923.124	Negative
0.65	101.024	Negative
0.65	149.009	Negative
0.65	160.842	Negative
0.65	162.84	Negative
0.65	195.811	Negative
0.65	197.808	Negative
0.65	199.804	Negative
0.65	209.03	Negative
0.65	223.046	Negative
0.65	251.041	Negative
0.65	276.033	Negative
0.65	307.03	Negative
0.65	311.098	Negative
0.65	321.014	Negative
0.65	353.072	Negative
0.65	435.044	Negative
0.65	439.077	Negative
0.65	445.119	Negative
0.65	447.073	Negative
0.65	456.106	Negative
0.65	507.065	Negative
0.65	515.124	Negative
0.65	519.016	Negative
0.65	529.047	Negative
0.65	539.021	Negative
0.65	545.036	Negative
0.65	546.117	Negative
0.65	559.034	Negative
0.65	581.011	Negative
0.65	601.131	Negative
0.65	602.991	Negative
0.65	615.145	Negative
0.65	763.184	Negative
0.65	777.197	Negative
0.65	857.241	Negative
0.65	861.136	Negative
0.67	111.009	Negative
0.67	145.014	Negative
0.67	174.012	Negative
0.67	186.039	Negative
0.67	230.031	Negative
0.67	233.034	Negative
0.67	217.035	Negative
0.67	244.046	Negative
0.67	288.035	Negative
0.67	290.088	Negative
0.67	306.997	Negative
0.67	325.041	Negative
0.67	349.039	Negative
0.67	379.048	Negative
0.67	367.051	Negative
0.67	391.065	Negative
0.67	426.16	Negative
0.67	511.14	Negative
0.67	583.122	Negative
0.67	632.204	Negative
0.67	781.214	Negative
0.67	899.116	Negative
0.7	128.035	Negative
0.7	134.048	Negative
0.7	173.046	Negative
0.7	177.04	Negative
0.7	199.025	Negative
0.7	204.051	Negative
0.7	212.955	Negative
0.7	216.051	Negative
0.7	239.974	Negative
0.7	252.963	Negative
0.7	296.928	Negative
0.7	308.098	Negative
0.7	311.003	Negative
0.7	317.098	Negative
0.7	319.029	Negative
0.7	331.028	Negative
0.7	332.981	Negative
0.7	362.995	Negative
0.7	401.088	Negative
0.7	430.95	Negative
0.7	431.138	Negative
0.7	432.161	Negative
0.7	460.956	Negative
0.7	470.15	Negative
0.7	563.146	Negative
0.72	187.025	Negative
0.72	194.928	Negative
0.72	221.093	Negative
0.72	222.984	Negative
0.72	275.022	Negative
0.72	278.88	Negative
0.72	290.971	Negative
0.72	307.961	Negative
0.72	321.08	Negative
0.72	349.125	Negative
0.72	408.931	Negative
0.72	444.982	Negative
0.74	156.068	Negative
0.74	175.025	Negative
0.74	194.083	Negative
0.74	201.059	Negative
0.74	268.936	Negative
0.74	289.019	Negative
0.74	304.991	Negative
0.74	329.012	Negative
0.74	366.903	Negative
0.74	542.171	Negative
0.74	637.049	Negative
0.76	164.072	Negative
0.76	229.034	Negative
0.76	276.072	Negative
0.76	329.063	Negative
0.76	337.076	Negative
0.76	359.094	Negative
0.76	426.979	Negative
0.76	599.192	Negative
0.76	659.031	Negative
0.78	133.05	Negative
0.78	203.02	Negative
0.78	207.051	Negative
0.78	213.007	Negative
0.78	275.04	Negative
0.78	280.989	Negative
0.78	297.979	Negative
0.78	299.103	Negative
0.78	305.017	Negative
0.78	306.058	Negative
0.78	326.101	Negative
0.78	348.976	Negative
0.78	355.087	Negative
0.78	370.958	Negative
0.78	415.108	Negative
0.78	427.009	Negative
0.78	438.945	Negative
0.78	448.991	Negative
0.78	457.119	Negative
0.78	619.169	Negative
0.81	111.009	Negative
0.81	139.016	Negative
0.81	173.009	Negative
0.81	196.023	Negative
0.81	281.087	Negative
0.81	289.936	Negative
0.81	290.088	Negative
0.81	310.093	Negative
0.81	310.969	Negative
0.81	314.124	Negative
0.81	323.027	Negative
0.81	328.045	Negative
0.81	330.119	Negative
0.81	344.039	Negative
0.81	370.15	Negative
0.81	377.035	Negative
0.81	377.118	Negative
0.81	399.984	Negative
0.81	404.998	Negative
0.81	405.027	Negative
0.81	393.113	Negative
0.81	419.127	Negative
0.81	421	Negative
0.81	421.134	Negative
0.81	433.144	Negative
0.81	435.122	Negative
0.81	435.957	Negative
0.81	437.059	Negative
0.81	438.126	Negative
0.81	455.14	Negative
0.81	463.108	Negative
0.81	488.169	Negative
0.81	492.167	Negative
0.81	502.985	Negative
0.81	515.124	Negative
0.81	522.182	Negative
0.81	536.066	Negative
0.81	591.177	Negative
0.81	608.17	Negative
0.81	613.021	Negative
0.83	178.088	Negative
0.83	227.068	Negative
0.83	243.062	Negative
0.83	254.115	Negative
0.83	288.035	Negative
0.83	333.103	Negative
0.83	346.056	Negative
0.83	362.047	Negative
0.83	365.072	Negative
0.83	451.144	Negative
0.83	462.168	Negative
0.83	468.134	Negative
0.83	571.131	Negative
0.85	216.051	Negative
0.85	217.035	Negative
0.85	253.092	Negative
0.85	260.023	Negative
0.85	270.109	Negative
0.85	301.103	Negative
0.85	306.085	Negative
0.85	322.093	Negative
0.85	327.083	Negative
0.85	349.041	Negative
0.85	352.824	Negative
0.85	356.121	Negative
0.85	395.131	Negative
0.85	414.126	Negative
0.85	432.933	Negative
0.85	450.789	Negative
0.85	632.205	Negative
0.85	656.207	Negative
0.85	794.258	Negative
0.85	907.182	Negative
0.87	1097.23	Negative
0.87	134.048	Negative
0.87	188.057	Negative
0.87	199.025	Negative
0.87	312.095	Negative
0.87	272.039	Negative
0.87	278.88	Negative
0.87	295.102	Negative
0.87	302.066	Negative
0.87	304.063	Negative
0.87	325.113	Negative
0.87	329.086	Negative
0.87	472.773	Negative
0.87	481.088	Negative
0.87	570.739	Negative
0.87	731.153	Negative
0.9	175.025	Negative
0.9	187.025	Negative
0.9	194.927	Negative
0.9	232.976	Negative
0.9	244.028	Negative
0.9	323.098	Negative
0.9	345.08	Negative
0.9	350.071	Negative
0.9	380.052	Negative
0.9	429.124	Negative
0.9	397.161	Negative
0.9	419.096	Negative
0.9	426.126	Negative
0.9	446.114	Negative
0.9	458.803	Negative
0.9	539.162	Negative
0.9	501.145	Negative
0.9	550.173	Negative
0.9	565.175	Negative
0.9	573.163	Negative
0.9	578.753	Negative
0.9	587.157	Negative
0.9	628.17	Negative
0.9	663.142	Negative
0.9	666.212	Negative
0.9	848.268	Negative
0.92	206.989	Negative
0.92	208.062	Negative
0.92	221.067	Negative
0.92	225.042	Negative
0.92	274.976	Negative
0.92	338.854	Negative
0.92	339.056	Negative
0.92	339.092	Negative
0.92	341.015	Negative
0.92	342.963	Negative
0.92	347.023	Negative
0.92	410.95	Negative
0.92	434.823	Negative
0.92	459.134	Negative
0.92	478.937	Negative
0.92	539.094	Negative
0.92	555.12	Negative
0.92	556.147	Negative
0.92	563.173	Negative
0.92	616.245	Negative
0.92	643.136	Negative
0.92	653.09	Negative
0.92	696.706	Negative
0.92	738.161	Negative
0.92	783.242	Negative
0.94	1104.24	Negative
0.94	156.067	Negative
0.94	200.057	Negative
0.94	215.018	Negative
0.94	216.91	Negative
0.94	218.906	Negative
0.94	232.007	Negative
0.94	236.969	Negative
0.94	252.964	Negative
0.94	257.023	Negative
0.94	336.858	Negative
0.94	344.098	Negative
0.94	456.807	Negative
0.94	504.15	Negative
0.94	542.172	Negative
0.94	576.756	Negative
0.94	816.655	Negative
0.94	921.704	Negative
0.96	218.067	Negative
0.96	229.035	Negative
0.96	271.093	Negative
0.96	321.046	Negative
0.96	441.123	Negative
0.96	536.16	Negative
0.96	598.738	Negative
0.96	745.168	Negative
0.99	1016.23	Negative
0.99	172.04	Negative
0.99	199.061	Negative
0.99	210.088	Negative
0.99	224.129	Negative
0.99	225.004	Negative
0.99	232.073	Negative
0.99	233.066	Negative
0.99	235.083	Negative
0.99	237.008	Negative
0.99	238.891	Negative
0.99	240.028	Negative
0.99	243.052	Negative
0.99	275.023	Negative
0.99	276.072	Negative
0.99	345.082	Negative
0.99	358.84	Negative
0.99	434.069	Negative
0.99	449.265	Negative
0.99	478.788	Negative
0.99	495.171	Negative
0.99	500.77	Negative
0.99	527.123	Negative
0.99	549.088	Negative
0.99	554.259	Negative
0.99	572.114	Negative
0.99	600.266	Negative
0.99	628.396	Negative
0.99	672.205	Negative
0.99	674.402	Negative
0.99	853.534	Negative
0.99	899.54	Negative
0.99	914.193	Negative
1.01	1009.22	Negative
1.01	161.046	Negative
1.01	219.052	Negative
1.01	227.057	Negative
1.01	286.093	Negative
1.01	292.14	Negative
1.01	295.103	Negative
1.01	358.114	Negative
1.01	415.144	Negative
1.01	454.191	Negative
1.01	462.126	Negative
1.01	485.149	Negative
1.01	503.16	Negative
1.01	517.251	Negative
1.01	638.183	Negative
1.01	738.663	Negative
1.03	1016.73	Negative
1.03	1104.74	Negative
1.03	138.056	Negative
1.03	182.046	Negative
1.03	186.077	Negative
1.03	202.108	Negative
1.03	246.098	Negative
1.03	247.043	Negative
1.03	260.873	Negative
1.03	317.049	Negative
1.03	328.114	Negative
1.03	329.088	Negative
1.03	369.139	Negative
1.03	380.821	Negative
1.03	428.065	Negative
1.03	489.141	Negative
1.03	548.014	Negative
1.03	550.228	Negative
1.03	638.683	Negative
1.03	826.68	Negative
1.05	110.025	Negative
1.05	1111.25	Negative
1.05	195.066	Negative
1.05	233.03	Negative
1.05	243.087	Negative
1.05	254.067	Negative
1.05	258.062	Negative
1.05	259.045	Negative
1.05	265.093	Negative
1.05	283.068	Negative
1.05	285.108	Negative
1.05	288.953	Negative
1.05	305.087	Negative
1.05	308.114	Negative
1.05	317.135	Negative
1.05	363.094	Negative
1.05	407.154	Negative
1.05	483.135	Negative
1.05	595.143	Negative
1.05	607.206	Negative
1.05	626.874	Negative
1.05	826.177	Negative
1.05	928.21	Negative
1.08	125.001	Negative
1.08	153.032	Negative
1.08	165.056	Negative
1.08	183.03	Negative
1.08	213.077	Negative
1.08	226.036	Negative
1.08	231.051	Negative
1.08	252.051	Negative
1.08	272.981	Negative
1.08	310.057	Negative
1.08	325.108	Negative
1.08	375.128	Negative
1.08	392.929	Negative
1.08	411.106	Negative
1.08	413.104	Negative
1.08	414.912	Negative
1.08	421.134	Negative
1.08	425.166	Negative
1.08	449.075	Negative
1.08	495.146	Negative
1.08	455.138	Negative
1.08	523.165	Negative
1.08	530.152	Negative
1.08	537.18	Negative
1.08	558.887	Negative
1.08	567.193	Negative
1.08	610.198	Negative
1.08	640.225	Negative
1.08	751.268	Negative
1.1	188.093	Negative
1.1	190.051	Negative
1.1	239.023	Negative
1.1	264.088	Negative
1.1	289.103	Negative
1.1	294.963	Negative
1.1	309.118	Negative
1.1	297.119	Negative
1.1	331.104	Negative
1.1	361.114	Negative
1.1	377.143	Negative
1.1	438.124	Negative
1.1	527.113	Negative
1.1	536.112	Negative
1.1	619.123	Negative
1.1	833.185	Negative
1.1	921.201	Negative
1.12	176.072	Negative
1.12	229.072	Negative
1.12	271.046	Negative
1.12	279.07	Negative
1.12	356.098	Negative
1.12	385.134	Negative
1.12	391.122	Negative
1.12	405.139	Negative
1.12	419.121	Negative
1.12	429.15	Negative
1.12	443.176	Negative
1.12	453.122	Negative
1.12	457.097	Negative
1.12	476.155	Negative
1.12	482.124	Negative
1.12	650.145	Negative
1.12	729.246	Negative
1.12	731.225	Negative
1.12	765.246	Negative
1.12	840.693	Negative
1.15	160.041	Negative
1.15	194.046	Negative
1.15	211.073	Negative
1.15	255.054	Negative
1.15	315.072	Negative
1.15	326.124	Negative
1.15	335.098	Negative
1.15	357.081	Negative
1.15	389.108	Negative
1.15	455.05	Negative
1.15	469.121	Negative
1.15	487.079	Negative
1.15	509.058	Negative
1.15	540.171	Negative
1.15	526.141	Negative
1.15	671.204	Negative
1.15	677.214	Negative
1.15	693.187	Negative
1.15	749.154	Negative
1.15	757.221	Negative
1.15	779.223	Negative
1.17	219.041	Negative
1.17	227.057	Negative
1.17	239.067	Negative
1.17	281.125	Negative
1.17	463.144	Negative
1.17	465.127	Negative
1.17	533.158	Negative
1.17	581.176	Negative
1.17	594.219	Negative
1.17	657.218	Negative
1.17	845.257	Negative
1.19	1027.22	Negative
1.19	221.02	Negative
1.19	238.011	Negative
1.19	257.073	Negative
1.19	329.053	Negative
1.19	337.069	Negative
1.19	347.098	Negative
1.19	350.1	Negative
1.19	362.951	Negative
1.19	364.088	Negative
1.19	455.108	Negative
1.19	507.17	Negative
1.19	570.169	Negative
1.19	844.678	Negative
1.21	1125.26	Negative
1.21	226.036	Negative
1.21	339.129	Negative
1.21	354.104	Negative
1.21	371.098	Negative
1.21	375.093	Negative
1.21	449.163	Negative
1.21	468.136	Negative
1.21	474.086	Negative
1.21	525.083	Negative
1.21	593.071	Negative
1.21	625.095	Negative
1.21	833.688	Negative
1.21	844.177	Negative
1.21	935.217	Negative
1.24	142.051	Negative
1.24	143.035	Negative
1.24	205.035	Negative
1.24	275.056	Negative
1.24	286.072	Negative
1.24	295.103	Negative
1.24	299.077	Negative
1.24	301.092	Negative
1.24	316.13	Negative
1.24	343.067	Negative
1.24	369.082	Negative
1.24	415.091	Negative
1.24	427.171	Negative
1.24	444.148	Negative
1.24	474.124	Negative
1.24	541.14	Negative
1.24	547.154	Negative
1.24	603.193	Negative
1.24	618.232	Negative
1.24	727.197	Negative
1.26	131.035	Negative
1.26	147.066	Negative
1.26	212.072	Negative
1.26	256.062	Negative
1.26	300.051	Negative
1.26	431.119	Negative
1.26	435.112	Negative
1.26	455.132	Negative
1.26	584.149	Negative
1.28	187.061	Negative
1.28	217.036	Negative
1.28	224.057	Negative
1.28	231.052	Negative
1.28	287.077	Negative
1.28	324.071	Negative
1.28	326.111	Negative
1.28	392.133	Negative
1.28	398.108	Negative
1.28	407.075	Negative
1.28	417.103	Negative
1.28	434.093	Negative
1.28	458.129	Negative
1.28	476.154	Negative
1.28	485.091	Negative
1.28	519.17	Negative
1.28	523.203	Negative
1.28	559.167	Negative
1.28	572.162	Negative
1.28	731.26	Negative
1.31	175.025	Negative
1.31	179.056	Negative
1.31	201.041	Negative
1.31	203.056	Negative
1.31	215.056	Negative
1.31	230.067	Negative
1.31	235.119	Negative
1.31	254.067	Negative
1.31	258.044	Negative
1.31	267.063	Negative
1.31	285.063	Negative
1.31	287.038	Negative
1.31	303.074	Negative
1.31	331.067	Negative
1.31	380.163	Negative
1.31	409.044	Negative
1.31	411.106	Negative
1.31	412.112	Negative
1.31	416.119	Negative
1.31	421.134	Negative
1.31	438.125	Negative
1.31	451.055	Negative
1.31	466.126	Negative
1.31	489.124	Negative
1.31	495.135	Negative
1.31	551.124	Negative
1.31	562.192	Negative
1.31	888.263	Negative
1.33	213.04	Negative
1.33	276.098	Negative
1.33	310.093	Negative
1.33	329.088	Negative
1.33	359.134	Negative
1.33	444.114	Negative
1.33	492.182	Negative
1.33	514.156	Negative
1.33	538.174	Negative
1.33	719.271	Negative
1.35	185.046	Negative
1.35	194.046	Negative
1.35	255.054	Negative
1.35	314.115	Negative
1.35	355.102	Negative
1.35	383.155	Negative
1.35	403.051	Negative
1.35	435.149	Negative
1.35	452.143	Negative
1.35	737.286	Negative
1.37	125.024	Negative
1.37	173.045	Negative
1.37	211.07	Negative
1.37	241.083	Negative
1.37	312.072	Negative
1.37	269.092	Negative
1.37	271.082	Negative
1.37	293.113	Negative
1.37	323.094	Negative
1.37	377.144	Negative
1.37	427.124	Negative
1.37	440.139	Negative
1.37	445.132	Negative
1.37	505.156	Negative
1.37	510.147	Negative
1.37	525.181	Negative
1.37	530.129	Negative
1.37	531.149	Negative
1.37	542.171	Negative
1.37	593.172	Negative
1.37	601.224	Negative
1.37	635.169	Negative
1.4	260.078	Negative
1.4	271.046	Negative
1.4	313.08	Negative
1.4	331.103	Negative
1.4	378.113	Negative
1.4	399.146	Negative
1.4	409.089	Negative
1.4	409.171	Negative
1.4	431.071	Negative
1.4	467.139	Negative
1.4	484.131	Negative
1.4	493.063	Negative
1.4	499.151	Negative
1.4	509.088	Negative
1.4	526.078	Negative
1.4	553.174	Negative
1.4	567.191	Negative
1.4	577.076	Negative
1.4	584.185	Negative
1.4	594.066	Negative
1.4	624.14	Negative
1.4	645.064	Negative
1.4	683.204	Negative
1.4	713.051	Negative
1.4	751.193	Negative
1.4	781.04	Negative
1.4	837.205	Negative
1.4	905.193	Negative
1.42	228.052	Negative
1.42	345.081	Negative
1.42	373.113	Negative
1.42	394.099	Negative
1.42	441.101	Negative
1.42	397.109	Negative
1.42	405.139	Negative
1.42	419.119	Negative
1.42	431.028	Negative
1.42	433.044	Negative
1.42	436.109	Negative
1.42	448.145	Negative
1.42	455.026	Negative
1.42	461.134	Negative
1.42	467.086	Negative
1.42	471.088	Negative
1.42	501.163	Negative
1.42	503.152	Negative
1.42	557.149	Negative
1.42	516.141	Negative
1.42	521.186	Negative
1.42	535.164	Negative
1.42	521.151	Negative
1.42	543.133	Negative
1.42	564.156	Negative
1.42	583.184	Negative
1.42	733.256	Negative
1.42	747.235	Negative
1.42	769.218	Negative
1.42	822.268	Negative
1.42	917.254	Negative
1.44	220.062	Negative
1.44	279.108	Negative
1.44	379.161	Negative
1.44	403.123	Negative
1.44	474.125	Negative
1.44	502.119	Negative
1.44	673.202	Negative
1.44	675.212	Negative
1.44	701.214	Negative
1.44	739.267	Negative
1.44	755.201	Negative
1.44	808.251	Negative
1.44	840.695	Negative
1.44	845.258	Negative
1.46	395.028	Negative
1.46	477.124	Negative
1.46	493.155	Negative
1.46	556.149	Negative
1.46	566.123	Negative
1.46	646.199	Negative
1.46	661.197	Negative
1.46	687.212	Negative
1.46	731.208	Negative
1.46	733.22	Negative
1.46	725.193	Negative
1.46	745.671	Negative
1.46	837.268	Negative
1.46	840.193	Negative
1.46	903.239	Negative
1.46	928.711	Negative
1.49	1079.31	Negative
1.49	1101.29	Negative
1.49	232.977	Negative
1.49	343.103	Negative
1.49	357.964	Negative
1.49	359.098	Negative
1.49	381.08	Negative
1.49	391.124	Negative
1.49	411.09	Negative
1.49	417.056	Negative
1.49	422.094	Negative
1.49	427.085	Negative
1.49	429.161	Negative
1.49	479.14	Negative
1.49	444.075	Negative
1.49	446.152	Negative
1.49	449.068	Negative
1.49	457.069	Negative
1.49	469.111	Negative
1.49	471.11	Negative
1.49	479.074	Negative
1.49	495.076	Negative
1.49	496.13	Negative
1.49	512.062	Negative
1.49	517.054	Negative
1.49	534.045	Negative
1.49	575.163	Negative
1.49	585.042	Negative
1.49	602.032	Negative
1.49	653.03	Negative
1.49	703.21	Negative
1.49	716.921	Negative
1.49	717.189	Negative
1.49	719.166	Negative
1.49	719.205	Negative
1.49	721.017	Negative
1.49	777.248	Negative
1.49	763.168	Negative
1.49	751.231	Negative
1.49	772.114	Negative
1.49	789.004	Negative
1.49	793.243	Negative
1.49	825.269	Negative
1.49	853.263	Negative
1.49	867.281	Negative
1.51	1123.27	Negative
1.51	164.072	Negative
1.51	197.01	Negative
1.51	321.046	Negative
1.51	395.074	Negative
1.51	449.092	Negative
1.51	547.128	Negative
1.51	569.162	Negative
1.51	589.124	Negative
1.51	594.22	Negative
1.51	596.127	Negative
1.51	598.214	Negative
1.51	618.173	Negative
1.51	642.236	Negative
1.51	692.222	Negative
1.51	741.187	Negative
1.51	757.16	Negative
1.53	225.008	Negative
1.53	311.135	Negative
1.53	333.081	Negative
1.53	378.148	Negative
1.53	441.161	Negative
1.53	489.124	Negative
1.53	515.141	Negative
1.53	586.204	Negative
1.53	617.209	Negative
1.53	686.23	Negative
1.53	737.252	Negative
1.53	881.258	Negative
1.55	227.056	Negative
1.55	229.018	Negative
1.55	232.061	Negative
1.55	264.052	Negative
1.55	291.018	Negative
1.55	323.135	Negative
1.55	375.057	Negative
1.55	432.166	Negative
1.55	448.16	Negative
1.55	467.14	Negative
1.55	484.131	Negative
1.55	495.161	Negative
1.55	500.153	Negative
1.55	533.15	Negative
1.55	535.129	Negative
1.55	639.213	Negative
1.55	659.183	Negative
1.55	662.193	Negative
1.55	675.178	Negative
1.55	683.238	Negative
1.55	928.21	Negative
1.58	1118.26	Negative
1.58	315.072	Negative
1.58	334.093	Negative
1.58	335.096	Negative
1.58	347.133	Negative
1.58	423.138	Negative
1.58	458.15	Negative
1.58	461.13	Negative
1.58	460.197	Negative
1.58	629.189	Negative
1.58	586.13	Negative
1.58	631.151	Negative
1.58	653.134	Negative
1.58	697.159	Negative
1.58	748.247	Negative
1.58	776.28	Negative
1.6	1023.23	Negative
1.6	1023.73	Negative
1.6	1111.75	Negative
1.6	373.077	Negative
1.6	380.135	Negative
1.6	383.059	Negative
1.6	424.127	Negative
1.6	435.147	Negative
1.6	535.167	Negative
1.6	562.119	Negative
1.6	598.165	Negative
1.6	603.155	Negative
1.6	642.206	Negative
1.6	657.186	Negative
1.6	851.249	Negative
1.6	923.327	Negative
1.6	935.216	Negative
1.6	935.715	Negative
1.62	167.035	Negative
1.62	213.077	Negative
1.62	222.078	Negative
1.62	266.078	Negative
1.62	301.057	Negative
1.62	312.073	Negative
1.62	343.067	Negative
1.62	378.067	Negative
1.62	397.075	Negative
1.62	400.05	Negative
1.62	411.185	Negative
1.62	439.055	Negative
1.62	451.046	Negative
1.62	465.125	Negative
1.62	447.06	Negative
1.62	473.129	Negative
1.62	491.14	Negative
1.62	497.134	Negative
1.62	511.108	Negative
1.62	513.124	Negative
1.62	541.155	Negative
1.62	609.16	Negative
1.62	617.208	Negative
1.62	631.188	Negative
1.62	637.211	Negative
1.62	681.167	Negative
1.62	757.219	Negative
1.62	763.231	Negative
1.64	1118.76	Negative
1.64	195.03	Negative
1.64	258.098	Negative
1.64	269.031	Negative
1.64	329.088	Negative
1.64	341.088	Negative
1.64	357.08	Negative
1.64	366.083	Negative
1.64	368.094	Negative
1.64	371.098	Negative
1.64	393.082	Negative
1.64	395.098	Negative
1.64	401.068	Negative
1.64	417.079	Negative
1.64	449.13	Negative
1.64	463.146	Negative
1.64	467.086	Negative
1.64	526.141	Negative
1.64	533.05	Negative
1.64	535.106	Negative
1.64	549.125	Negative
1.64	553.176	Negative
1.64	554.169	Negative
1.64	555.135	Negative
1.64	557.151	Negative
1.64	567.191	Negative
1.64	579.133	Negative
1.64	593.209	Negative
1.64	601.039	Negative
1.64	630.219	Negative
1.64	661.197	Negative
1.64	663.214	Negative
1.64	673.22	Negative
1.64	689.23	Negative
1.64	718.255	Negative
1.64	733.222	Negative
1.64	745.172	Negative
1.64	794.241	Negative
1.64	822.278	Negative
1.64	897.321	Negative
1.67	121.03	Negative
1.67	123.045	Negative
1.67	135.045	Negative
1.67	151.04	Negative
1.67	181.051	Negative
1.67	219.027	Negative
1.67	249.038	Negative
1.67	309.119	Negative
1.67	287.015	Negative
1.67	293.115	Negative
1.67	295.022	Negative
1.67	299.09	Negative
1.67	331.103	Negative
1.67	355.001	Negative
1.67	355.103	Negative
1.67	385.078	Negative
1.67	391.066	Negative
1.67	402.176	Negative
1.67	405.14	Negative
1.67	410.174	Negative
1.67	415.065	Negative
1.67	422.989	Negative
1.67	490.976	Negative
1.67	527.14	Negative
1.67	537.181	Negative
1.67	559.202	Negative
1.67	581.182	Negative
1.67	598.213	Negative
1.67	600.229	Negative
1.67	603.192	Negative
1.67	625.175	Negative
1.67	677.229	Negative
1.67	692.25	Negative
1.67	715.267	Negative
1.67	767.298	Negative
1.67	855.279	Negative
1.69	131.035	Negative
1.69	181.014	Negative
1.69	224.056	Negative
1.69	340.103	Negative
1.69	382.1	Negative
1.69	401.109	Negative
1.69	409.114	Negative
1.69	411.103	Negative
1.69	459.114	Negative
1.69	493.155	Negative
1.69	451.082	Negative
1.69	461.165	Negative
1.69	471.171	Negative
1.69	493.191	Negative
1.69	510.147	Negative
1.69	517.069	Negative
1.69	557.186	Negative
1.69	581.15	Negative
1.69	589.177	Negative
1.69	595.163	Negative
1.69	611.161	Negative
1.69	625.271	Negative
1.69	645.203	Negative
1.69	655.246	Negative
1.69	767.225	Negative
1.69	794.31	Negative
1.69	799.229	Negative
1.69	817.299	Negative
1.69	833.272	Negative
1.69	839.283	Negative
1.69	853.296	Negative
1.69	873.226	Negative
1.69	883.31	Negative
1.69	941.214	Negative
1.71	1009.2	Negative
1.71	1030.24	Negative
1.71	1030.74	Negative
1.71	239.066	Negative
1.71	402.103	Negative
1.71	454.119	Negative
1.71	476.102	Negative
1.71	483.127	Negative
1.71	489.095	Negative
1.71	507.17	Negative
1.71	514.192	Negative
1.71	527.099	Negative
1.71	544.089	Negative
1.71	586.213	Negative
1.71	587.161	Negative
1.71	595.087	Negative
1.71	612.076	Negative
1.71	663.074	Negative
1.71	707.206	Negative
1.71	731.062	Negative
1.71	753.283	Negative
1.71	773.213	Negative
1.71	783.257	Negative
1.71	799.049	Negative
1.71	805.239	Negative
1.71	819.278	Negative
1.71	869.295	Negative
1.73	1179.94	Negative
1.73	211.025	Negative
1.73	211.061	Negative
1.73	288.072	Negative
1.73	337.114	Negative
1.73	355.066	Negative
1.73	385.113	Negative
1.73	395.029	Negative
1.73	397.125	Negative
1.73	424.145	Negative
1.73	484.131	Negative
1.73	490.169	Negative
1.73	563.103	Negative
1.73	573.183	Negative
1.73	573.217	Negative
1.73	580.26	Negative
1.73	639.121	Negative
1.73	665.23	Negative
1.73	721.256	Negative
1.73	723.309	Negative
1.73	747.272	Negative
1.73	775.264	Negative
1.73	779.227	Negative
1.73	801.208	Negative
1.73	813.268	Negative
1.76	1125.26	Negative
1.76	1125.76	Negative
1.76	240.051	Negative
1.76	243.088	Negative
1.76	254.083	Negative
1.76	261.007	Negative
1.76	313.129	Negative
1.76	375.093	Negative
1.76	361.15	Negative
1.76	387.093	Negative
1.76	389.107	Negative
1.76	399.124	Negative
1.76	429.137	Negative
1.76	436.11	Negative
1.76	446.127	Negative
1.76	455.08	Negative
1.76	467.14	Negative
1.76	472.07	Negative
1.76	497.124	Negative
1.76	523.068	Negative
1.76	544.203	Negative
1.76	547.203	Negative
1.76	591.055	Negative
1.76	602.209	Negative
1.76	586.131	Negative
1.76	605.245	Negative
1.76	621.112	Negative
1.76	623.165	Negative
1.76	633.1	Negative
1.76	701.088	Negative
1.76	745.29	Negative
1.76	749.251	Negative
1.76	769.219	Negative
1.76	771.235	Negative
1.76	775.195	Negative
1.76	783.197	Negative
1.76	783.293	Negative
1.76	797.178	Negative
1.76	808.261	Negative
1.76	809.237	Negative
1.78	124.04	Negative
1.78	196.062	Negative
1.78	204.067	Negative
1.78	216.981	Negative
1.78	282.988	Negative
1.78	441.101	Negative
1.78	451.145	Negative
1.78	458.089	Negative
1.78	509.088	Negative
1.78	577.076	Negative
1.78	578.173	Negative
1.78	645.064	Negative
1.78	659.183	Negative
1.78	691.246	Negative
1.78	703.21	Negative
1.78	725.193	Negative
1.78	735.272	Negative
1.78	747.239	Negative
1.78	757.254	Negative
1.78	761.217	Negative
1.78	822.277	Negative
1.78	865.3	Negative
1.8	199.062	Negative
1.8	331.066	Negative
1.8	395.155	Negative
1.8	540.157	Negative
1.8	553.177	Negative
1.8	564.209	Negative
1.8	567.192	Negative
1.8	851.284	Negative
1.82	197.01	Negative
1.82	197.082	Negative
1.82	229.018	Negative
1.82	269.066	Negative
1.82	283.093	Negative
1.82	345.118	Negative
1.82	446.182	Negative
1.82	463.145	Negative
1.82	475.145	Negative
1.82	478.164	Negative
1.82	509.154	Negative
1.82	515.174	Negative
1.82	517.156	Negative
1.82	523.164	Negative
1.82	526.139	Negative
1.82	609.168	Negative
1.82	631.188	Negative
1.85	153.02	Negative
1.85	217.109	Negative
1.85	225.042	Negative
1.85	297.109	Negative
1.85	341.088	Negative
1.85	354.105	Negative
1.85	415.124	Negative
1.85	427.124	Negative
1.85	443.174	Negative
1.85	448.063	Negative
1.85	473.128	Negative
1.85	505.155	Negative
1.85	511.146	Negative
1.85	513.16	Negative
1.85	515.141	Negative
1.85	535.167	Negative
1.85	547.166	Negative
1.85	589.16	Negative
1.85	611.257	Negative
1.85	701.231	Negative
1.87	182.047	Negative
1.87	257.068	Negative
1.87	311.069	Negative
1.87	282.059	Negative
1.87	375.056	Negative
1.87	395.111	Negative
1.87	397.038	Negative
1.87	399.15	Negative
1.87	422.13	Negative
1.87	405.139	Negative
1.87	447.113	Negative
1.87	465.026	Negative
1.87	520.166	Negative
1.87	541.177	Negative
1.87	613.221	Negative
1.87	654.241	Negative
1.87	675.25	Negative
1.87	689.23	Negative
1.87	733.258	Negative
1.87	757.221	Negative
1.87	951.323	Negative
1.89	200.101	Negative
1.89	230.997	Negative
1.89	251.115	Negative
1.89	279.109	Negative
1.89	300.086	Negative
1.89	361.114	Negative
1.89	380.156	Negative
1.89	391.16	Negative
1.89	401.109	Negative
1.89	495.152	Negative
1.89	513.315	Negative
1.89	515.21	Negative
1.89	553.212	Negative
1.89	561.146	Negative
1.89	564.156	Negative
1.89	571.204	Negative
1.89	578.224	Negative
1.89	581.303	Negative
1.89	640.224	Negative
1.89	611.183	Negative
1.89	649.289	Negative
1.89	675.37	Negative
1.91	232.083	Negative
1.91	267.084	Negative
1.91	299.077	Negative
1.91	315.073	Negative
1.91	325.057	Negative
1.91	357.082	Negative
1.91	412.088	Negative
1.91	461.129	Negative
1.91	507.171	Negative
1.91	527.176	Negative
1.91	529.156	Negative
1.91	597.144	Negative
1.91	673.225	Negative
1.91	845.276	Negative
1.94	315.108	Negative
1.94	330.091	Negative
1.94	340.104	Negative
1.94	378.104	Negative
1.94	449.068	Negative
1.94	480.149	Negative
1.94	499.149	Negative
1.94	502.113	Negative
1.94	595.15	Negative
1.94	629.208	Negative
1.94	631.224	Negative
1.94	645.203	Negative
1.94	651.19	Negative
1.94	658.216	Negative
1.94	660.227	Negative
1.94	754.256	Negative
1.96	124.04	Negative
1.96	153.056	Negative
1.96	236.057	Negative
1.96	268.047	Negative
1.96	285.098	Negative
1.96	313.093	Negative
1.96	338.088	Negative
1.96	352.089	Negative
1.96	379.16	Negative
1.96	381.08	Negative
1.96	383.096	Negative
1.96	451.083	Negative
1.96	627.193	Negative
1.96	631.19	Negative
1.96	649.176	Negative
1.96	665.173	Negative
1.98	195.03	Negative
1.98	221.057	Negative
1.98	226.088	Negative
1.98	270.077	Negative
1.98	292.084	Negative
1.98	411.093	Negative
1.98	415.172	Negative
1.98	581.153	Negative
1.98	673.2	Negative
1.98	675.214	Negative
1.98	697.203	Negative
10.01	268.037	Negative
10.01	283.061	Negative
10.01	351.048	Negative
10.01	359.15	Negative
10.01	417.189	Negative
10.01	513.175	Negative
10.01	485.237	Negative
10.01	503.145	Negative
10.01	530.165	Negative
10.01	751.239	Negative
10.01	781.249	Negative
10.03	311.186	Negative
10.03	333.167	Negative
10.03	368.038	Negative
10.03	419.035	Negative
10.03	437.101	Negative
10.03	621.254	Negative
10.05	341.067	Negative
10.05	375.192	Negative
10.05	680.362	Negative
10.07	287.222	Negative
10.07	527.192	Negative
10.07	663.375	Negative
10.07	667.259	Negative
10.07	714.262	Negative
10.1	285.077	Negative
10.1	329.197	Negative
10.1	341.207	Negative
10.1	353.064	Negative
10.1	353.197	Negative
10.1	370.054	Negative
10.1	421.052	Negative
10.1	491.096	Negative
10.1	611.284	Negative
10.1	709.223	Negative
10.1	719.253	Negative
10.1	787.24	Negative
10.1	855.227	Negative
10.12	187.134	Negative
10.12	387.286	Negative
10.14	325.202	Negative
10.14	469.186	Negative
10.14	621.254	Negative
10.14	711.287	Negative
10.14	779.272	Negative
10.16	251.165	Negative
10.16	265.145	Negative
10.16	310.145	Negative
10.16	314.24	Negative
10.16	319.152	Negative
10.16	427.233	Negative
10.16	447.133	Negative
10.16	455.127	Negative
10.16	515.121	Negative
10.16	523.114	Negative
10.16	739.377	Negative
10.19	299.036	Negative
10.19	301.033	Negative
10.19	419.113	Negative
10.19	475.177	Negative
10.19	431.168	Negative
10.19	465.148	Negative
10.19	467.145	Negative
10.19	475.103	Negative
10.19	492.167	Negative
10.19	651.265	Negative
10.19	736.242	Negative
10.19	923.216	Negative
10.21	305.176	Negative
10.21	373.162	Negative
10.21	441.149	Negative
10.21	509.136	Negative
10.21	804.23	Negative
10.23	267.16	Negative
10.23	375.107	Negative
10.23	501.32	Negative
10.23	580.325	Negative
10.23	648.313	Negative
10.25	451.08	Negative
10.25	575.306	Negative
10.28	267.03	Negative
10.28	285.207	Negative
10.28	299.186	Negative
10.28	325.108	Negative
10.28	411.069	Negative
10.28	479.056	Negative
10.28	441.226	Negative
10.3	279.124	Negative
10.3	287.223	Negative
10.3	309.171	Negative
10.3	347.11	Negative
10.3	355.21	Negative
10.3	415.098	Negative
10.3	460.243	Negative
10.3	473.197	Negative
10.3	551.073	Negative
10.3	619.061	Negative
10.32	236.106	Negative
10.32	361.163	Negative
10.32	378.153	Negative
10.32	423.196	Negative
10.32	429.15	Negative
10.32	491.097	Negative
10.32	497.137	Negative
10.32	565.125	Negative
10.32	609.267	Negative
10.32	633.113	Negative
10.32	701.1	Negative
10.34	251.165	Negative
10.34	299.133	Negative
10.34	319.152	Negative
10.34	331.249	Negative
10.34	387.139	Negative
10.34	455.127	Negative
10.34	523.114	Negative
10.36	284.064	Negative
10.36	297.038	Negative
10.36	303.181	Negative
10.36	309.207	Negative
10.36	377.194	Negative
10.36	445.181	Negative
10.36	481.09	Negative
10.36	513.169	Negative
10.36	581.156	Negative
10.39	229.051	Negative
10.39	269.131	Negative
10.39	314.028	Negative
10.39	337.119	Negative
10.39	367.079	Negative
10.39	384.069	Negative
10.39	857.323	Negative
10.41	271.192	Negative
10.41	327.217	Negative
10.41	412.194	Negative
10.41	599.167	Negative
10.41	711.286	Negative
10.43	395.204	Negative
10.43	389.196	Negative
10.45	578.31	Negative
10.48	439.117	Negative
10.48	503.336	Negative
10.48	511.29	Negative
10.48	611.283	Negative
10.48	699.265	Negative
10.5	283.191	Negative
10.5	375.198	Negative
10.5	433.279	Negative
10.5	463.058	Negative
10.5	470.184	Negative
10.5	609.267	Negative
10.5	649.144	Negative
10.52	215.108	Negative
10.52	259.098	Negative
10.52	287.223	Negative
10.52	303.217	Negative
10.52	327.085	Negative
10.52	374.202	Negative
10.52	395.071	Negative
10.52	499.196	Negative
10.52	489.168	Negative
10.52	489.212	Negative
10.52	557.199	Negative
10.52	625.187	Negative
10.54	311.222	Negative
10.54	341.196	Negative
10.54	369.181	Negative
10.54	385.185	Negative
10.54	447.196	Negative
10.54	487.342	Negative
10.54	515.184	Negative
10.54	581.327	Negative
10.54	583.171	Negative
10.54	643.418	Negative
10.54	645.434	Negative
10.54	651.159	Negative
10.54	683.27	Negative
10.54	713.421	Negative
10.54	719.147	Negative
10.57	379.209	Negative
10.57	787.136	Negative
10.57	855.122	Negative
10.59	213.15	Negative
10.59	309.171	Negative
10.59	499.305	Negative
10.59	701.281	Negative
10.59	723.263	Negative
10.61	281.137	Negative
10.61	349.124	Negative
10.61	355.221	Negative
10.61	578.309	Negative
10.63	195.139	Negative
10.63	239.129	Negative
10.63	245.117	Negative
10.63	307.116	Negative
10.63	313.105	Negative
10.63	315.181	Negative
10.63	324.106	Negative
10.63	375.102	Negative
10.63	377.158	Negative
10.63	711.286	Negative
10.66	241.181	Negative
10.66	473.087	Negative
10.66	475.102	Negative
10.66	543.09	Negative
10.66	699.264	Negative
10.66	779.274	Negative
10.7	284.064	Negative
10.7	433.279	Negative
10.7	609.267	Negative
10.72	293.212	Negative
10.75	283.17	Negative
10.75	327.16	Negative
10.75	395.147	Negative
10.75	389.253	Negative
10.75	412.137	Negative
10.75	463.134	Negative
10.75	531.122	Negative
10.75	599.108	Negative
10.75	867.474	Negative
10.77	313.157	Negative
10.77	325.202	Negative
10.77	329.196	Negative
10.77	393.189	Negative
10.77	581.156	Negative
10.79	431.264	Negative
10.79	499.307	Negative
10.79	578.31	Negative
10.81	389.207	Negative
10.81	489.202	Negative
10.81	483.274	Negative
10.81	501.212	Negative
10.81	551.261	Negative
10.84	313.238	Negative
10.84	381.225	Negative
10.84	449.215	Negative
10.84	517.201	Negative
10.88	375.198	Negative
10.88	601.322	Negative
10.9	285.207	Negative
10.9	353.194	Negative
10.9	421.181	Negative
10.95	194.082	Negative
10.95	239.165	Negative
10.97	293.176	Negative
10.97	297.076	Negative
10.97	299.056	Negative
10.97	361.163	Negative
10.97	435.295	Negative
10.97	711.286	Negative
10.99	269.082	Negative
10.99	429.073	Negative
10.99	487.341	Negative
10.99	555.329	Negative
10.99	623.313	Negative
11.02	391.306	Negative
11.02	691.304	Negative
11.04	343.212	Negative
11.04	359.242	Negative
11.04	365.194	Negative
11.04	433.181	Negative
11.06	269.045	Negative
11.08	307.191	Negative
11.08	381.225	Negative
11.08	398.216	Negative
11.08	449.213	Negative
11.08	459.202	Negative
11.08	517.2	Negative
11.08	585.188	Negative
11.08	653.174	Negative
11.08	721.162	Negative
11.08	789.151	Negative
11.08	825.464	Negative
11.1	439.284	Negative
11.1	483.274	Negative
11.1	551.261	Negative
11.1	619.25	Negative
11.13	265.95	Negative
11.13	469.185	Negative
11.13	537.172	Negative
11.15	377.16	Negative
11.15	391.038	Negative
11.15	413.136	Negative
11.15	440.155	Negative
11.15	567.18	Negative
11.15	569.177	Negative
11.15	883.418	Negative
11.17	399.086	Negative
11.22	367.248	Negative
11.22	379.209	Negative
11.22	447.197	Negative
11.22	453.191	Negative
11.22	515.185	Negative
11.22	521.177	Negative
11.22	538.168	Negative
11.22	583.172	Negative
11.22	589.166	Negative
11.22	627.338	Negative
11.22	657.153	Negative
11.22	725.141	Negative
11.24	357.191	Negative
11.26	215.166	Negative
11.26	283.152	Negative
11.26	307.191	Negative
11.26	365.233	Negative
11.26	375.177	Negative
11.26	381.225	Negative
11.26	398.216	Negative
11.26	413.254	Negative
11.26	449.212	Negative
11.26	466.202	Negative
11.26	485.326	Negative
11.26	517.199	Negative
11.26	534.19	Negative
11.26	585.187	Negative
11.26	653.174	Negative
11.26	721.163	Negative
11.26	789.149	Negative
11.28	533.347	Negative
11.33	283.098	Negative
11.33	405.191	Negative
11.33	503.336	Negative
11.35	489.357	Negative
11.37	391.306	Negative
11.4	721.365	Negative
11.4	789.352	Negative
11.42	297.076	Negative
11.42	593.273	Negative
11.42	661.26	Negative
11.44	341.196	Negative
11.44	393.248	Negative
11.44	474.261	Negative
11.51	562.314	Negative
11.58	299.055	Negative
11.58	367.042	Negative
11.58	384.032	Negative
11.62	721.365	Negative
11.62	711.337	Negative
11.62	738.355	Negative
11.62	789.352	Negative
11.62	857.34	Negative
11.64	385.259	Negative
11.67	285.207	Negative
11.67	307.189	Negative
11.67	315.254	Negative
11.67	375.176	Negative
11.67	383.24	Negative
11.67	593.272	Negative
11.67	661.26	Negative
11.67	729.248	Negative
11.67	797.235	Negative
11.67	865.223	Negative
11.67	933.21	Negative
11.71	562.314	Negative
11.71	630.302	Negative
11.71	698.289	Negative
11.71	766.279	Negative
11.75	487.341	Negative
11.75	555.329	Negative
11.75	581.272	Negative
11.78	415.269	Negative
11.8	361.199	Negative
11.8	429.186	Negative
11.8	497.174	Negative
11.82	577.268	Negative
11.87	293.212	Negative
11.87	565.161	Negative
11.89	241.181	Negative
11.89	315.253	Negative
11.89	383.24	Negative
11.89	451.227	Negative
11.89	519.215	Negative
11.89	587.202	Negative
11.91	485.326	Negative
11.93	257.176	Negative
11.93	325.163	Negative
11.93	393.15	Negative
11.93	461.137	Negative
11.93	529.124	Negative
11.93	597.113	Negative
11.93	665.1	Negative
11.93	733.088	Negative
11.96	361.075	Negative
11.96	429.063	Negative
11.96	497.05	Negative
11.96	538.314	Negative
12	724.384	Negative
12.05	277.144	Negative
12.05	345.131	Negative
12.05	577.268	Negative
12.05	645.255	Negative
12.05	713.244	Negative
12.07	283.17	Negative
12.07	297.153	Negative
12.07	327.16	Negative
12.07	349.141	Negative
12.07	417.128	Negative
12.07	485.115	Negative
12.07	553.103	Negative
12.07	621.091	Negative
12.09	365.14	Negative
12.11	265.148	Negative
12.11	333.135	Negative
12.11	469.109	Negative
12.14	401.122	Negative
12.14	595.288	Negative
12.14	663.276	Negative
12.14	731.264	Negative
12.14	799.251	Negative
12.16	564.33	Negative
12.16	632.317	Negative
12.16	700.305	Negative
12.16	768.292	Negative
12.18	476.277	Negative
12.18	544.264	Negative
12.18	612.253	Negative
12.2	559.312	Negative
12.2	680.242	Negative
12.25	311.222	Negative
12.25	333.205	Negative
12.25	723.381	Negative
12.25	740.37	Negative
12.25	791.368	Negative
12.25	859.356	Negative
12.27	505.256	Negative
12.27	573.244	Negative
12.29	243.161	Negative
12.29	467.24	Negative
12.34	1040.24	Negative
12.36	504.309	Negative
12.36	564.33	Negative
12.36	581.321	Negative
12.36	632.317	Negative
12.36	649.309	Negative
12.36	700.305	Negative
12.36	768.293	Negative
12.36	785.282	Negative
12.36	836.28	Negative
12.36	904.269	Negative
[truncated: 19,635 more rows]
